# Supplementary material
Source: PubMed Central journal article supplement (PMC5828453)

SUPPLEMENTARY DATA

**Supplementary Table S1. Characteristics of the organ donors and human islet preparations used.**

| ID  | Gender | Age (years) | BMI (kg/m <sup>2</sup> ) | Cause of death | Purity (%) |
|-----|--------|-------------|--------------------------|----------------|------------|
| ID1 | M      | 69          | 25                       | CVD            | 85         |
| ID2 | M      | 85          | 25.5                     | CH             | 39         |
| ID3 | M      | 59          | 27.7                     | TR             | 56         |
| ID4 | F      | 76          | 19.5                     | CH             | 35         |
| ID5 | F      | 64          | 23.4                     | CH             | 76         |
| ID6 | M      | 42          | 32.6                     | TR             | 36         |
| ID7 | M      | 78          | 23.4                     | TR             | 43         |
| ID8 | F      | 63          | 27.3                     | ST             | 58         |
| ID9 | F      | 63          | 26                       | CH             | 45         |

The abbreviations used are as follows: F, female; M, male; BMI, body mass index; CVD, cardiovascular disease; CH, cerebral hemorrhage; TR, trauma; ST, stroke. Purity indicates the percentage of beta cells in the human islet preparations as determined by immunostaining for insulin.

**Supplementary Table S2. Sequences of siRNAs used to knock down gene expression.**

| Name                                    | Supplier                   | Sequence                                                                   |
|-----------------------------------------|----------------------------|----------------------------------------------------------------------------|
| siCTL (Allstars Negative Control siRNA) | Qiagen, Venlo, Netherlands | Not provided                                                               |
| siSRp55#1 Silencer Select siRNAi        | Invitrogen, Pasley, UK     | 5'GCGUCUACAUAGGACGCCUGAGCUA 3'                                             |
| siSRp55#2 Silencer Select siRNAi        | Invitrogen, Pasley, UK     | 5'CCUGUUCGUACAGAAUACAGGCCUUA3'                                             |
| siBAX $\beta$ Custom designed           | Dharmacon, Lafayette, USA  | Sense 5' UCGCUAUGUUGCCCAGGUUUU 3'<br>Antisense 5' AACCGGGCAACAUAGCGAUU 3'  |
| siBIM Silencer Select siRNAi            | Invitrogen, Pasley, UK     | 5' ACGAAUGGUUAUCUUACGACUGUU 3'                                             |
| siJNK1 Silencer Select siRNAi           | Invitrogen, Pasley, UK     | 5'GGGCCUACAGAGAGCUAGUUCUUAU3'                                              |
| siIRE1 $\alpha$ Silencer Select siRNAi  | Invitrogen, Pasley, UK     | 5'CCCUACCUACACGGUGGACAUCUUU 3'                                             |
| siMAP3K7e12 Custom designed             | Dharmacon                  | Sense 5' UGGAUGUCCCUGAGAUCGUUU 3'<br>Antisense 5' ACGAUCUCAGGGACAUCUUAU 3' |
| siJNK1e3 Custom designed                | Dharmacon                  | Sense 5' UCACAGAGGUAAAGCAUCAU 3'<br>Antisense 5' UGAUGCUUUACCUCUGUGAUU 3'  |
| siJNK2e2 Custom designed                | Lafayette, USA             | Sense 5' AGUCUGACCCUGAACGUUAU 3'<br>Antisense 5' UAACGUUCAGGGUCAGACUUU 3'  |

SUPPLEMENTARY DATA

**Supplementary Table S3. Sequences of primers used for splicing analyses and real time.**

| Gene Target                           | Application | Forward (5'-3')                                | Reverse (5'-3')                                |
|---------------------------------------|-------------|------------------------------------------------|------------------------------------------------|
| <i>BAX</i>                            | SPL         | AGCAAAGTGGTGTCAAGG                             | CGTCCCAAAGTAGGAGAGGA<br>CACTGTGACCTGCTCCAGAA   |
| <i>BIM</i>                            | SPL         | ATGGCAAAGCAACCTTCTG                            | CTCCTTGCATAGTAAGCGT                            |
| <i>SMARCC2</i>                        | SPL         | CGACTGAACCCCAAGAGTA                            | CCTGTTCTGTCCACTCACGA                           |
| <i>DNM2</i>                           | SPL         | CCCCGGACTTGGCATTTCGAG<br>TCTTCACCCCGACATGGCC   | CTGGTACACTGCCTAACTG<br>ACCGTGCCAGCTCTGAGACCA   |
| <i>SNAP25</i>                         | SPL         | CGTGTCGAAGAAGGCATGAACC<br>GAACAAGGAGAACAACCTGG | GACATATGAAAAGGCCACAGC<br>GCTTGTTACAGGGACACACAC |
| <i>CACNA2D1</i>                       | SPL         | GTGTGATGGGAGTAGATGTGTC                         | CATTCTCTAACTCTGCATC                            |
| <i>CACNA1D</i>                        | SPL         | GCCTCAGAGAAGGTCCAGTG                           | AGTGGGGGTCCCTGAAATAG                           |
| <i>MAPK9 (JNK2)</i>                   | SPL         | GCAAGTGGCAGACTCAACCT                           | TTTGTGGTGTAAACACATTTAACAAA                     |
| <i>MAP3K7</i>                         | SPL         | GTGGGAGCAGTGTGGAGAG                            | TGACCAGGTTCTGTTCCAGTT                          |
| <i>MAPK8 (JNK1)</i>                   | SPL         | CGGCTTCTTGGTGAATTTTT<br>CGGTCTTGACGCCTTACAGT   | CCTTGAGCTCCTGAGCCTAT                           |
| <i>DIABLO</i>                         | SPL         | GGCTCTGAAGAGTTGGCTGT                           | CCTCTGAATTCATTTTCCCAAG                         |
| <i>INSR</i>                           | SPL         | TGAGGATTACCTGCACAACG                           | GAGGAAGTGTGGGGAAAGC                            |
| <i>ACTB</i>                           | qRT         | CTGTACGCCAACACAGTGCT                           | GCTCAGGAGGAGCAATGATC                           |
| <i>SRSF6 (SRp55)</i>                  | qRT         | CATAGGACGCCTGAGCTACA                           | TGCCGTTTACGCTCGTAAAC                           |
| <i>FOXO1</i>                          | qRT         | CGTGCCCTACTTCAAGGATAA                          | CACGAATGAACCTGCTGTGTAG                         |
| <i>NEUROD1</i>                        | qRT         | CTATCACTGCTCAGGACCTACT                         | CCACTCTCGCTGTACGATTT                           |
| <i>NKX6.1</i>                         | qRT         | GGGCTCGTTTTGGCCTATT                            | CGTGCTTCTTCTCCACTT                             |
| <i>PDX1</i>                           | qRT         | AAAGCTCACGCGTGAAAA                             | GCCGTGAGATGTACTTGTTGA                          |
| <i>BIM</i>                            | qRT         | TTCTTGACGCCACCCTGC                             | CTTGCGTTTCTCAGTCCGA                            |
| <i>BIM S</i>                          | qRT         | GAGCCACAAGCTTCCATGAG                           | TAACCATTCTGTTGGTGGTCT                          |
| <i>BAX<math>\beta</math></i>          | qRT         | AGGGTGGTTGGGTGAGACT                            | AGGGTCCCAGAGGAGTGG                             |
| <i>MAPK8</i>                          | qRT         | GGACTGCAGGAACGAGTTTT                           | CAACTGACCAAATGTCAACG                           |
| <i>CHOP</i>                           | qRT         | QuantiTect QT00082278                          | QuantiTect QT00082278                          |
| <i>BIP</i>                            | qRT         | QuantiTect QT00096404                          | QuantiTect QT00096404                          |
| <i>XBP1 spliced</i>                   | qRT         | CCGCAGCAGGTGCAGG                               | GAGTCAATACCGCCAGAATCCA                         |
| <i>ERN1 (IRE1<math>\alpha</math>)</i> | qRT         | GGCGCAACAGAATACACCAT                           | GGCCGCATAGTCAAAGTAGG                           |

The abbreviations used are as follows: SPL, primers used to analyse splicing variants; qRT, primers used for real time qRT-PCR;

SUPPLEMENTARY DATA

**Supplementary Table S4.** Antibodies used for Western blotting and immunofluorescence are listed.

| Antibodies                     | Source                         | Identifier | Dilution   |
|--------------------------------|--------------------------------|------------|------------|
| Insulin (mouse)                | Sigma-Aldrich, Bornem, Belgium | I2018      | IHC: 1:500 |
| SRSF6/ SRp55 (rabbit)          | LifeSpan Bioscience            | LS-B5712   | IHC: 1:500 |
| SRSF6/ SRp55 (rabbit)          | LifeSpan Bioscience            | LS-C290327 | WB: 1:1000 |
| SAPK/JNK (mouse)               | Cell Signaling Technology      | 9251S      | WB: 1:1000 |
| JNK1 (mouse)                   | Cell Signaling Technology      | 3708S      | WB: 1:1000 |
| Phospho-JNK (rabbit)           | Cell Signaling Technology      | #9251      | WB: 1:1000 |
| MKK7 (rabbit)                  | Cell Signaling Technology      | #4172      | WB: 1:1000 |
| Phospho-MKK7 (rabbit)          | Merck Millipore                | 36-013     | WB: 1:1000 |
| c-JUN (rabbit)                 | Cell Signaling Technology      | #9165      | WB: 1:1000 |
| Phospho-c-JUN (rabbit)         | Cell Signaling Technology      | #9164      | WB: 1:1000 |
| eIF2 $\alpha$ (rabbit)         | Cell Signaling Technology      | #5324      | WB: 1:1000 |
| Phospho-eIF2 $\alpha$ (rabbit) | Cell Signaling Technology      | #3597      | WB: 1:1000 |
| PERK (rabbit)                  | Cell Signaling Technology      | #3192      | WB: 1:1000 |
| Phospho-PERK (rabbit)          | Cell Signaling Technology      | #3179      | WB: 1:1000 |
| Phospho-IRE1 $\alpha$ (rabbit) | Novusbio, Littleton, USA       | NB100-2323 | WB: 1:500  |
| IRE1 $\alpha$ (rabbit)         | Cell Signaling Technology      | #3294      | WB: 1:1000 |
| ATF3 (rabbit)                  | Santa Cruz Biotechnology       | sc188      | WB: 1:1000 |
| Cleaved Caspase 3 (rabbit)     | Cell Signaling Technology      | #9664      | ICC: 1:200 |
| BAX (rabbit)                   | Santa Cruz Biotechnology       | sc-492     | ICC: 1:200 |
| ATP synthase $\beta$ (mouse)   | Sigma-Aldrich, Bornem, Belgium | A9728      | ICC: 1:500 |
| BIM (rabbit)                   | Cell Signaling Technology      | #2819      | WB: 1:1000 |
| $\alpha$ -Tubulin (mouse)      | Sigma Aldrich                  | T5168      | WB: 1:5000 |
| Caspase 3                      | Cell Signaling Technology      | 9661S      | ICC: 1:200 |

**Supplementary Table S5. Alternative splicing events modified by SRp55 depletion in EndoC- $\beta$ H1 cells.** List of modified cassette exons (**S5.1**), mutually exclusive exons (**S5.2**), alternative 3' splice sites (**S5.3**), alternative 5' splice sites (**S5.4**) and retained introns (**S5.5**). For each event the genomic coordinates, gene name and difference in PSI ( $\Delta$ PSI) are indicated. **S5.6**) List of gene ontology (biological process) enriched terms in all alternatively-spliced genes. **S5.7**) List of KEGG enriched pathways in all alternatively-spliced genes.

**Supplementary Table S6. Genes modified by SRp55 depletion in EndoC- $\beta$ H1 cells.** **S6.1**) List of down-regulated genes. Median RPKM expression for each condition and log<sub>2</sub> fold change are indicated. **S6.2**) List of gene ontology (biological process) enriched terms in down-regulated genes. **S6.3**) List of KEGG enriched pathways in down-regulated genes. **S6.4**) List of up-regulated genes. Median RPKM expression for each condition and log<sub>2</sub> fold change are indicated. **S6.5**) List of gene ontology (biological process) enriched terms in up-regulated genes. **S6.6**) List of KEGG enriched pathways in up-regulated genes.

SUPPLEMENTARY DATA

**Supplementary Figure 1. SRp55 is down-regulated by pro-inflammatory cytokines and this contributes to cytokine-induced beta cell death.** **A)** Representative western blot and densitometric measurements showing the expression of SRp55 in EndoC-βH1 cells non-treated (NT) or following a 48 h exposure to IL-1β + IFN-γ (cytokines). **B and C)** EndoC-βH1 cells were transfected with an empty vector (pFLAG) or a vector expressing SRp55 (pSRp55). After transfection, cells were left untreated or exposed to IL-1β plus IFN-γ for 48 h. **B)** SRp55 protein expression was evaluated by Western-blot. Expression values were normalized by the highest value of each experiment, considered as 1. **C)** Apoptosis was evaluated by Hoechst/PI staining. Results are mean ± SEM of three to six independent experiments. **A)** \*p < 0.05 non-treated (NT) vs cytokines by paired t test. **B and C)** \*\*p < 0.01 pFLAG vs pSRp55 under non-treated conditions, ###p<0.001 pFLAG vs pSRp55 under cytokines exposure, and &&&p<0.001 as indicated by a bar by ANOVA followed by Bonferroni post hoc test.

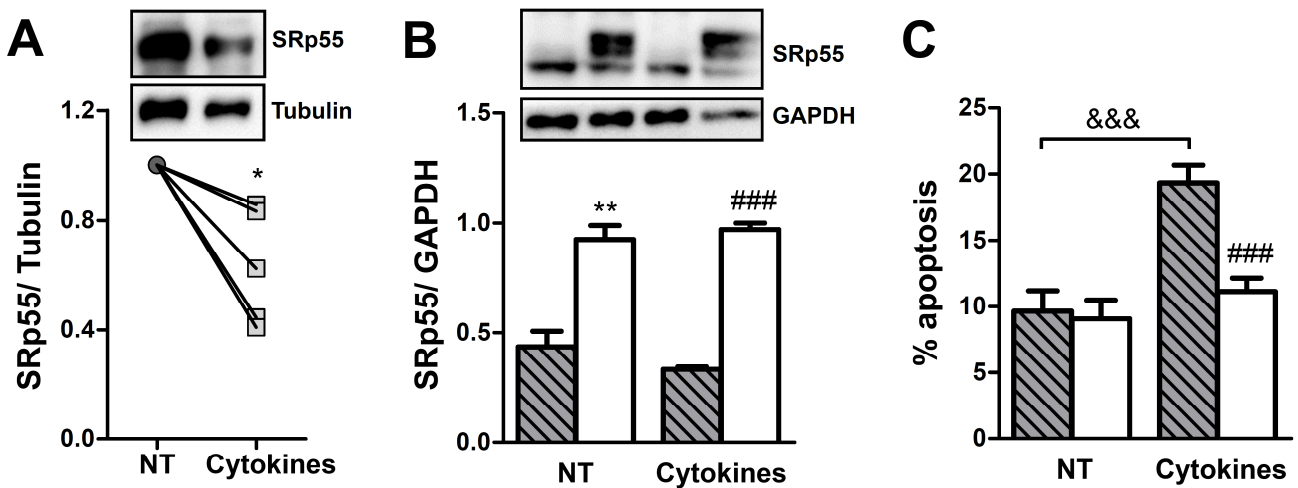

SUPPLEMENTARY DATA

**Supplementary Figure 2. Impact of SRp55 depletion on alternative splicing as compared to gene expression.** **A)** Expression profiles of splice variants in control versus SRp55-KD cells. **B)** Expression profiles of genes in control versus SRp55-KD cells. **C)** Number of up- and down-regulated genes following SRp55 silencing. **D)** Venn diagram showing the overlap between differentially spliced and differentially expressed genes. Results are based on five independent experiments.

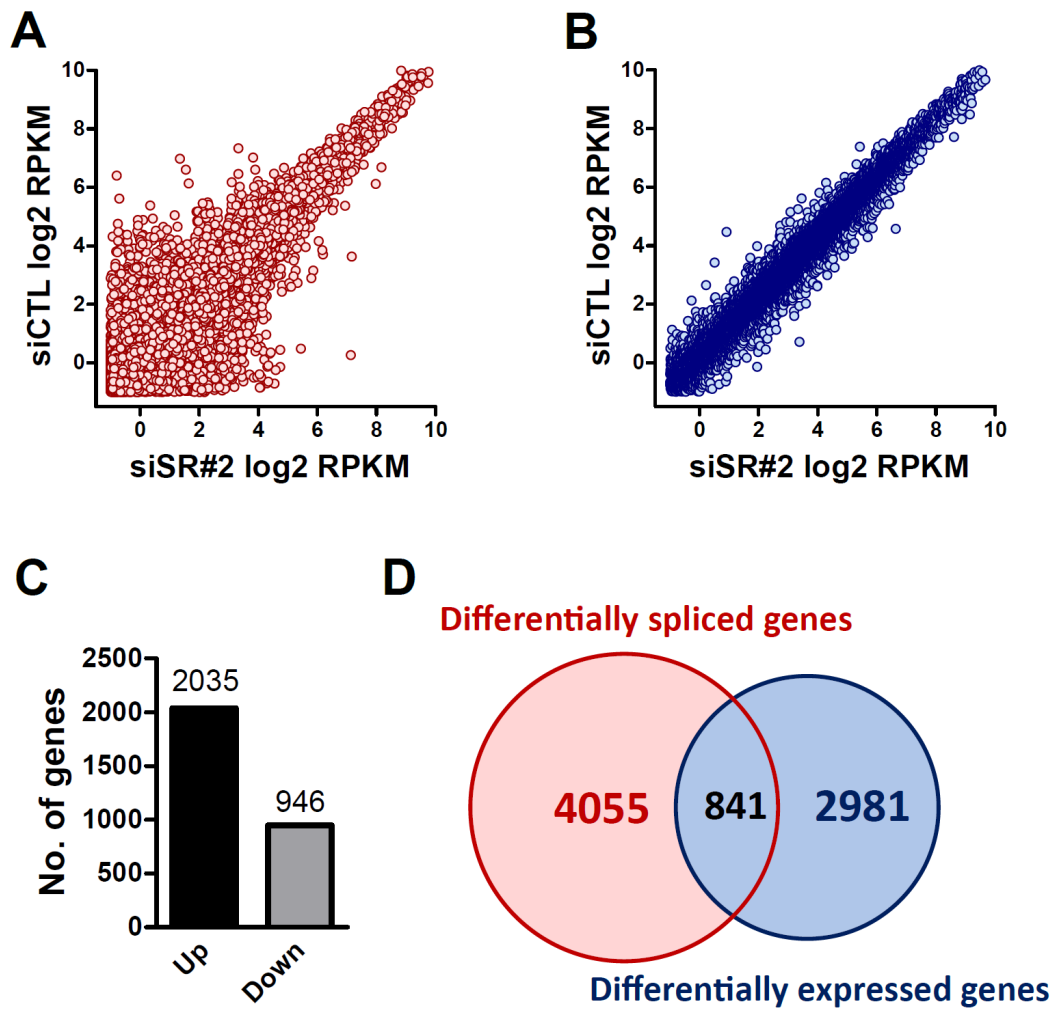

SUPPLEMENTARY DATA

**Supplementary Figure 3. Enrichment analysis of SRp55 binding-motifs in modified cassette exons.** **A)** Position weight matrices of SRp55 binding-motifs identified by SELEX (6-mer on the upper side) and by *de novo* prediction after SRp55 overexpression (9-mer on the lower side). **B)** Distribution of  $\Delta$ PSI values in modified cassette exons, showing a clear predominance of exon skipping. **(C-D)** Representation of the spatial distribution of SRp55 binding-motifs in the vicinity of alternatively spliced cassette exons. The position weight matrices shown in **(A)** were used to scan the occurrence of binding motifs in respectively 1,449 and 3,820 up-regulated or down-regulated exons whose inclusion is impacted by SRp55 KD, and compared against 134,507 non-modified cassette exons (FDR  $\geq$ 50%). The solid lines indicate the mean SRp55 binding motif score for each nucleotide position. Dotted lines indicate log<sub>10</sub> p-values obtained by statistical comparison of motif scores between modified exons (down- or up-regulated) against non-modified background exons, showing significant enrichment of the SRp55 binding motif in exonic sequences of down-regulated exons. The green box represents an average cassette exon, while solid lines and grey boxes represent neighbouring introns and up- and down-stream exons respectively. The numbers shown above indicate the relative nucleotide position from exon-intron junctions. Enrichment of the 6-mer motif is shown in **(C)**, while enrichment of the 9-mer motif is shown in **(D)**. Results are based on five independent RNA-seq experiments.

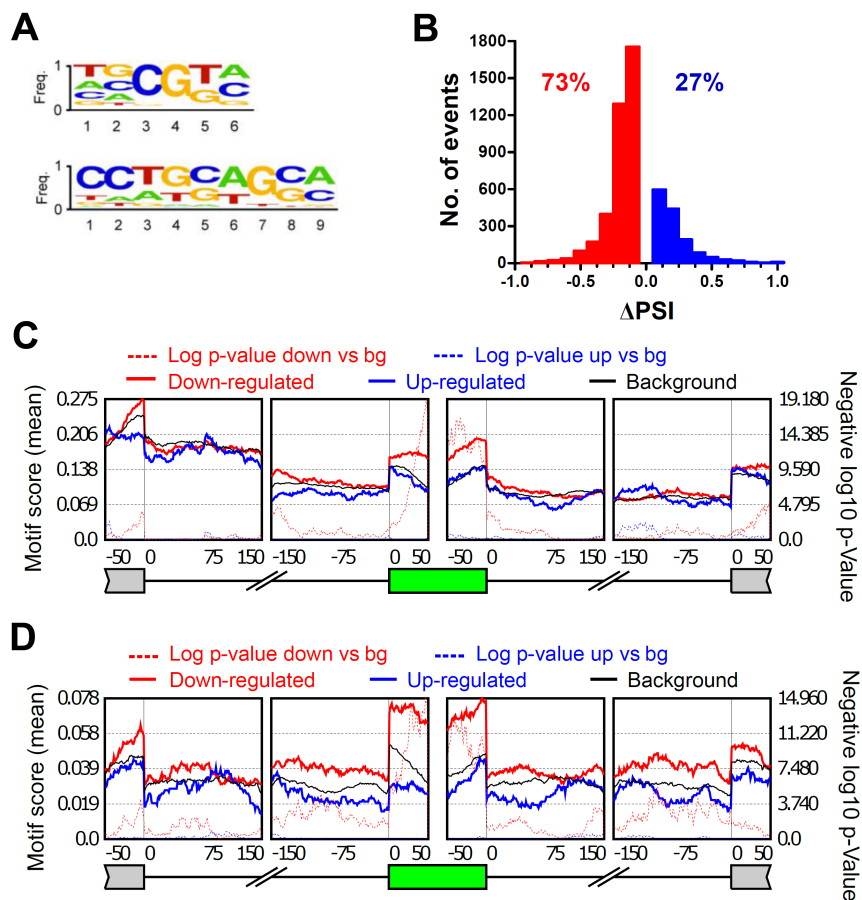

SUPPLEMENTARY DATA

**Supplementary Figure 4. SRp55 KD affects splicing and expression of the pro-apoptotic protein BIM contributing to beta cell apoptosis.** **A)** Representative western blot showing the expression of BIM isoforms in control and SRp55 KD EndoC-βH1 cells. **B)** Ratio between BIM small (S) and BIM large (L) isoforms was calculated by densitometry. **C)** Protein expression of total BIM was measured by densitometry of all BIM isoforms and normalized by α-tubulin as loading control. Protein expression values were normalized by the highest value of each experiment, considered as 1. **D-F)** Double KD of SRp55 and BIM in EndoC-βH1 cells. Cells were transfected with siCTL, siSRp55#2, siBim or siSRp55#2 + siBim for 48 h. mRNA expression of SRp55 (D) and BIM S (E) was measured by qRT-PCR and normalized by the housekeeping gene β-actin. mRNA expression values were normalized by the highest value of each experiment, considered as 1. **F)** Proportion of apoptotic cells was evaluated by Hoechst/PI staining. Results are mean ± SEM of four to five independent experiments. \*p < 0.05, \*\*p < 0.01 and \*\*\*p < 0.001 vs. siCTL; ###p < 0.01 and ####p < 0.001 as indicated by bars. **B, C)** Paired t-test. **D-F)** ANOVA followed by Bonferroni post hoc test.

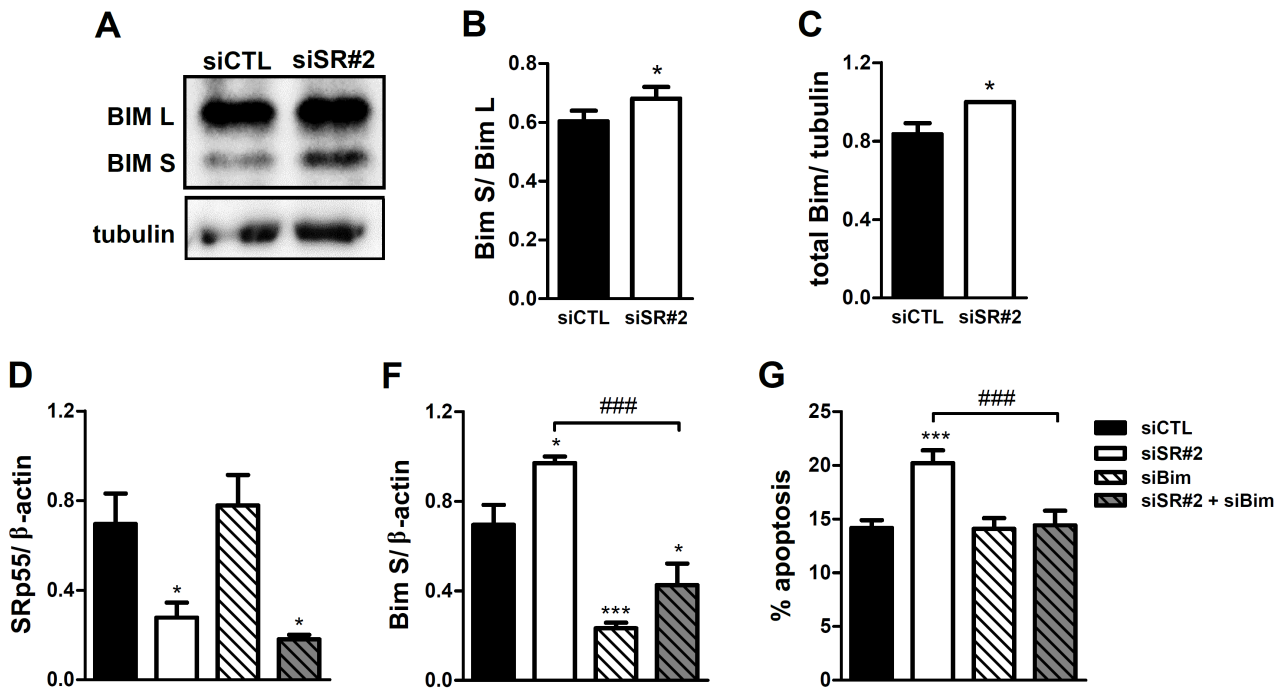

Supplement: DB170736SupplementaryData1.pdf [file DB170736SupplementaryData1.pdf]
